# Supplementary material for: Therapy-induced lipid uptake and remodeling underpin ferroptosis hypersensitivity in prostate cancer
Source: PubMed Central journal article supplement (PMC7304214; doi:10.1186/s40170-020-00217-6), 2020-06-19

Fig S1A

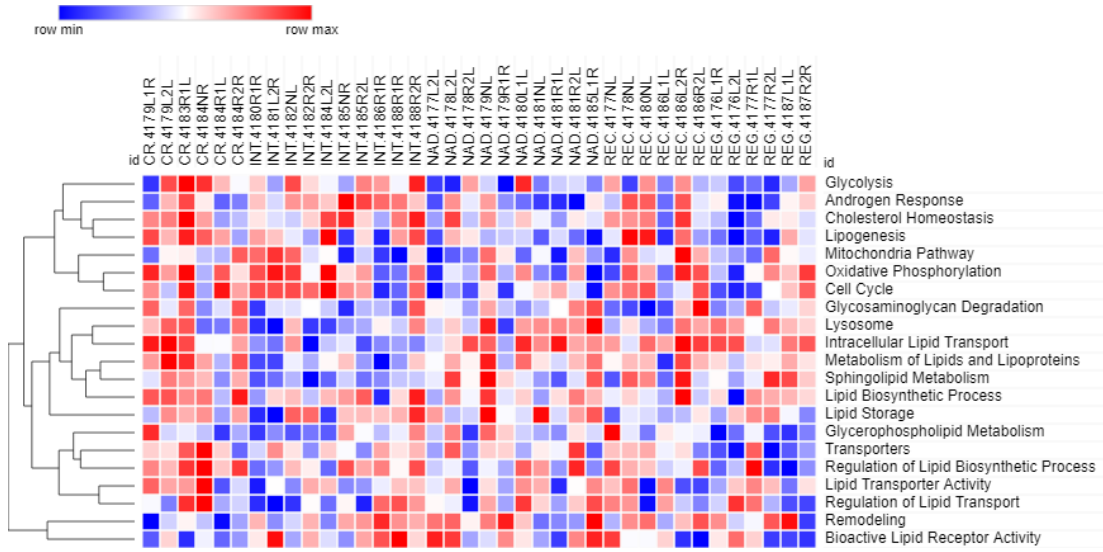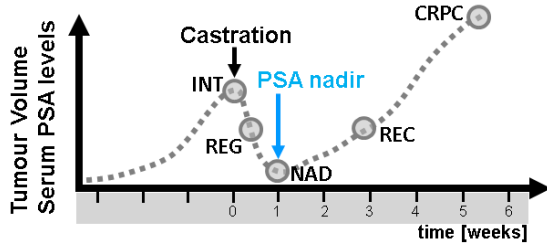

Fig S1B

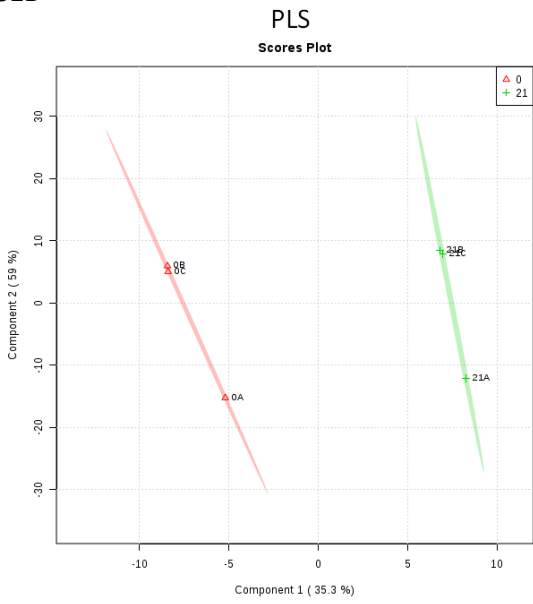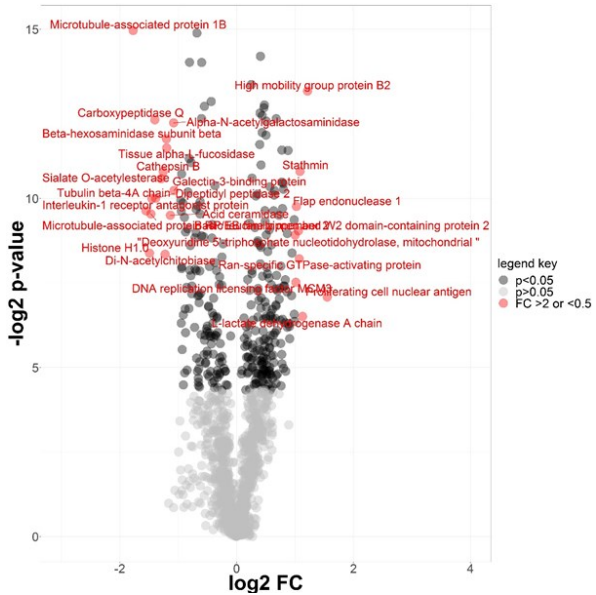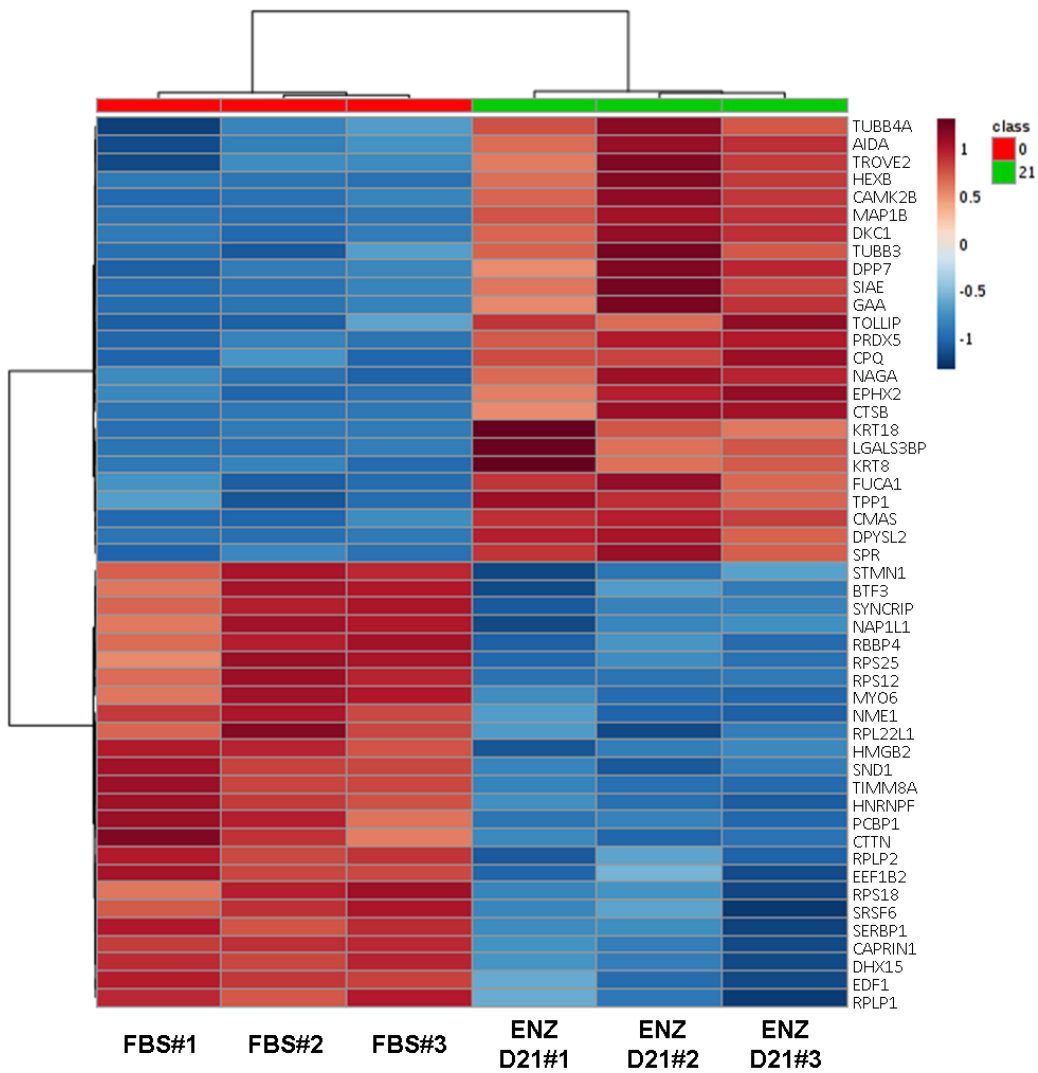

Fig S1C

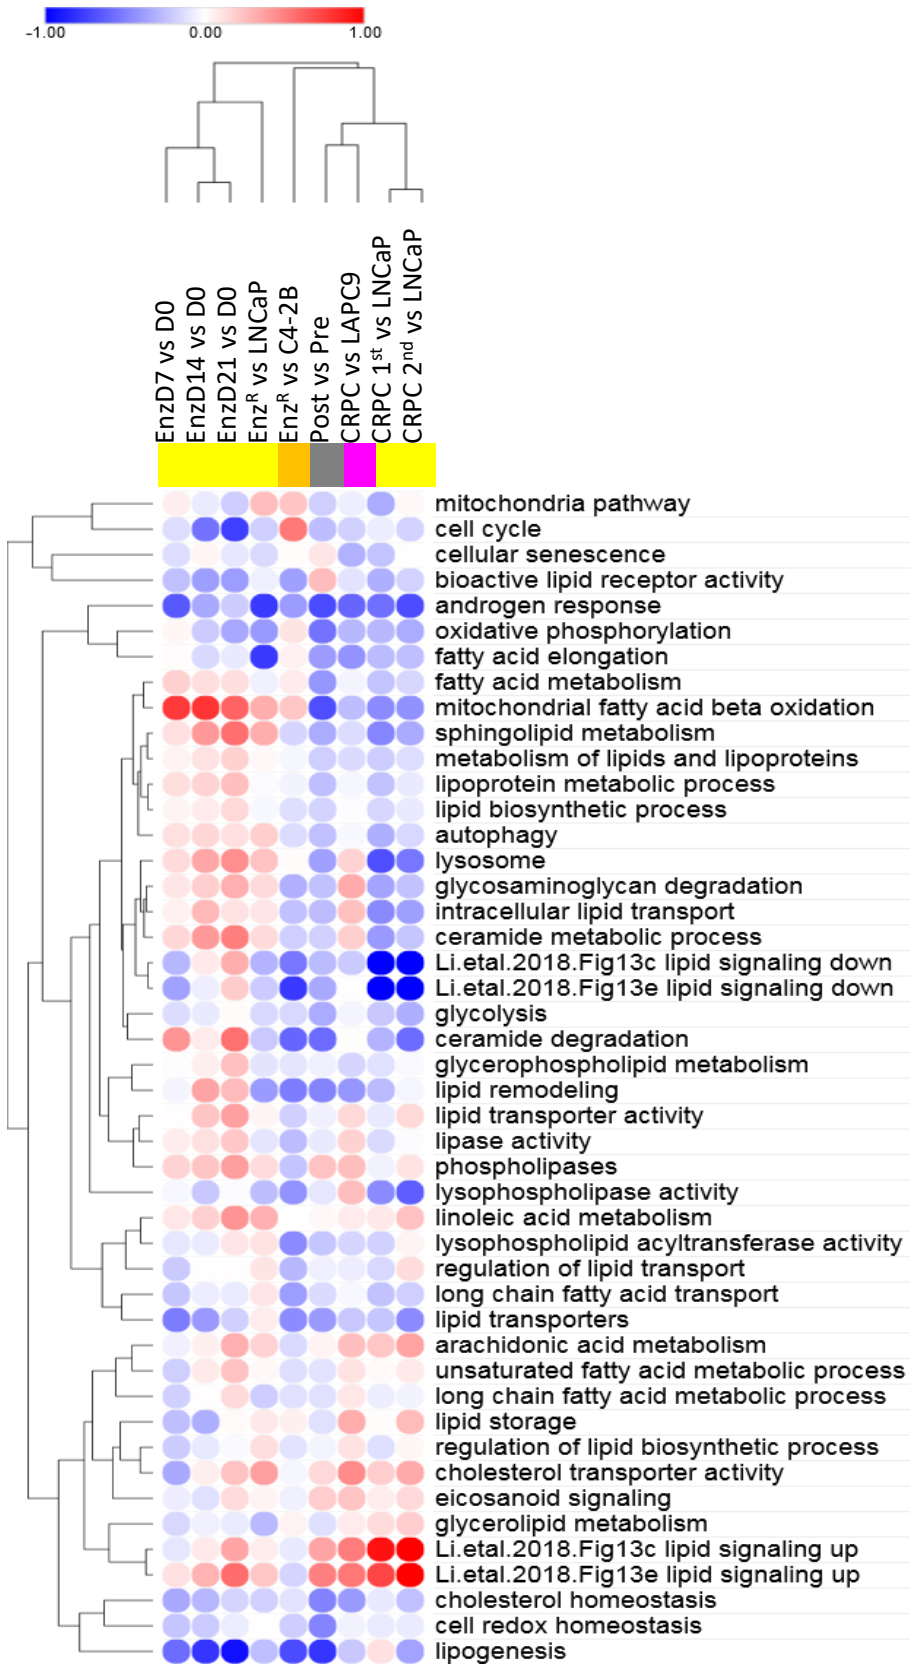

Fig S2A

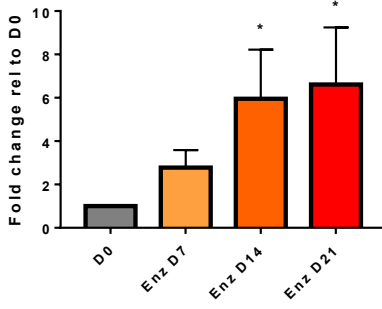

Fig S2B

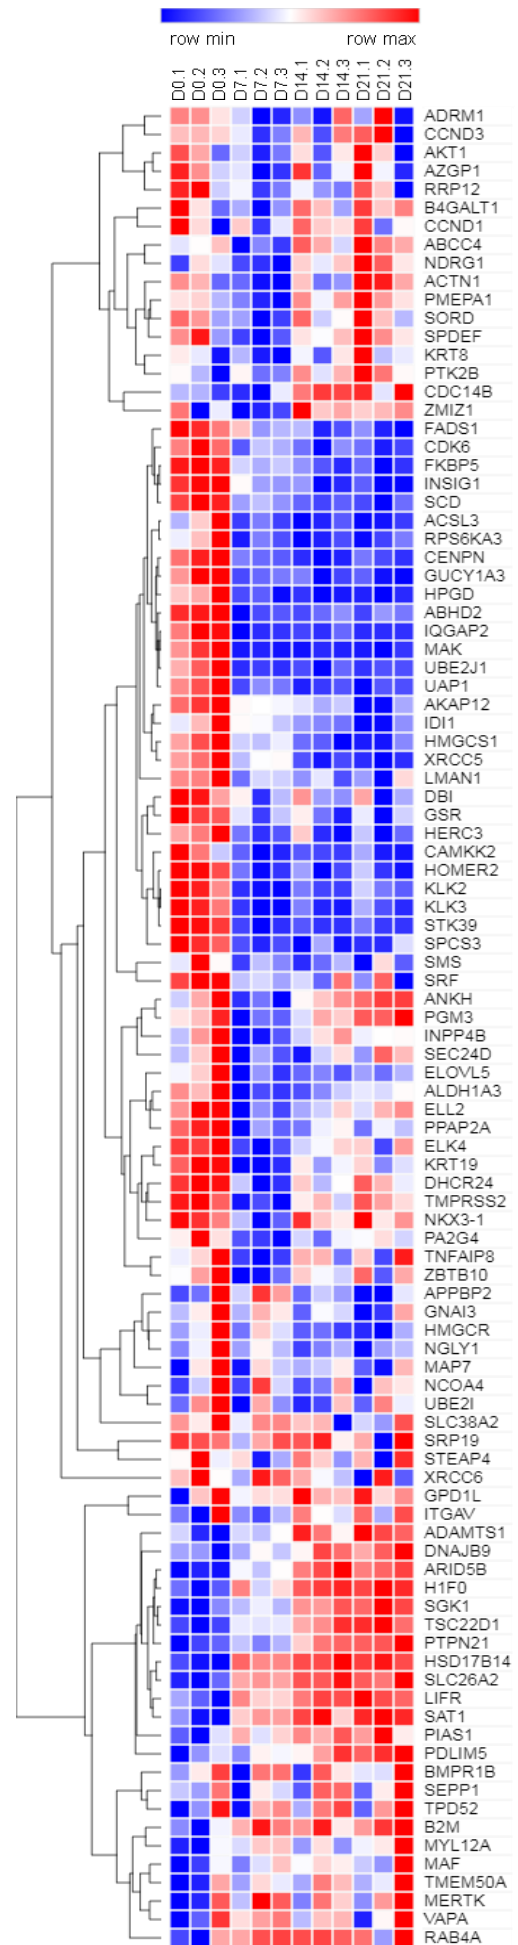

Fig S2C

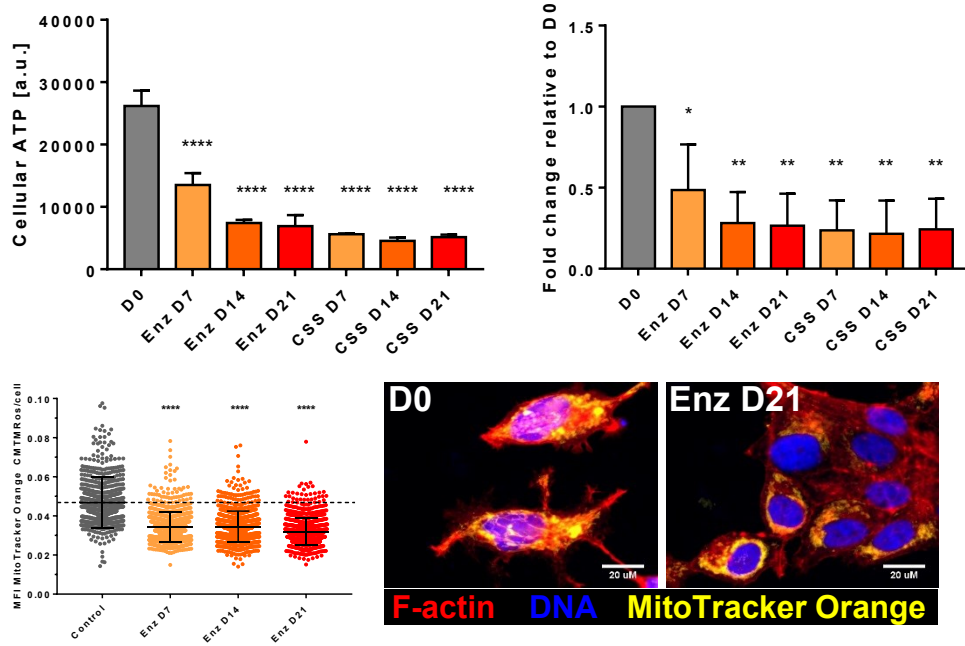

Fig S2D

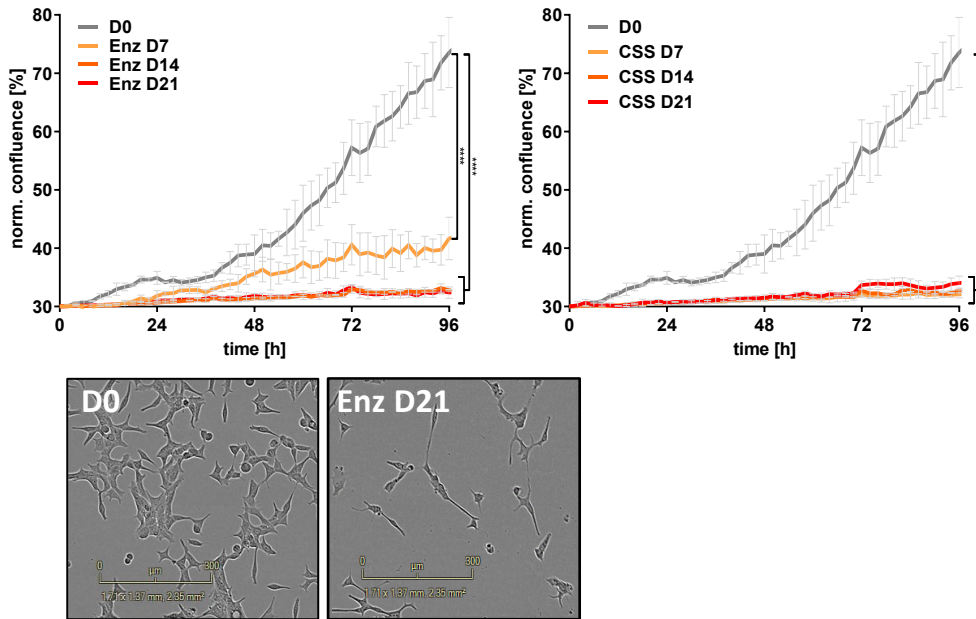

Fig S2E

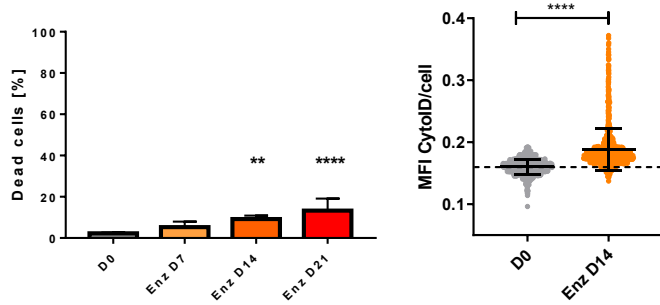

Fig S2F

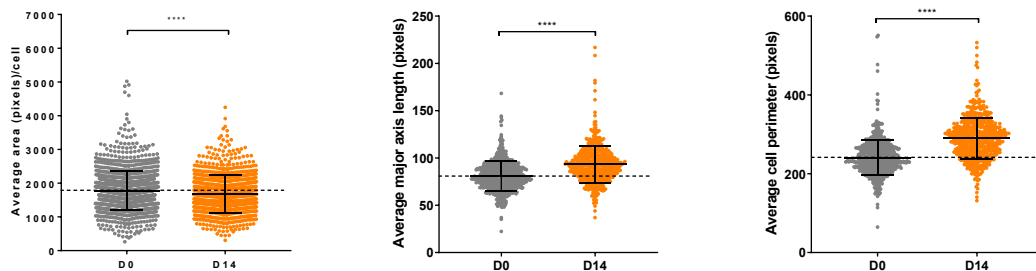

Fig S2G

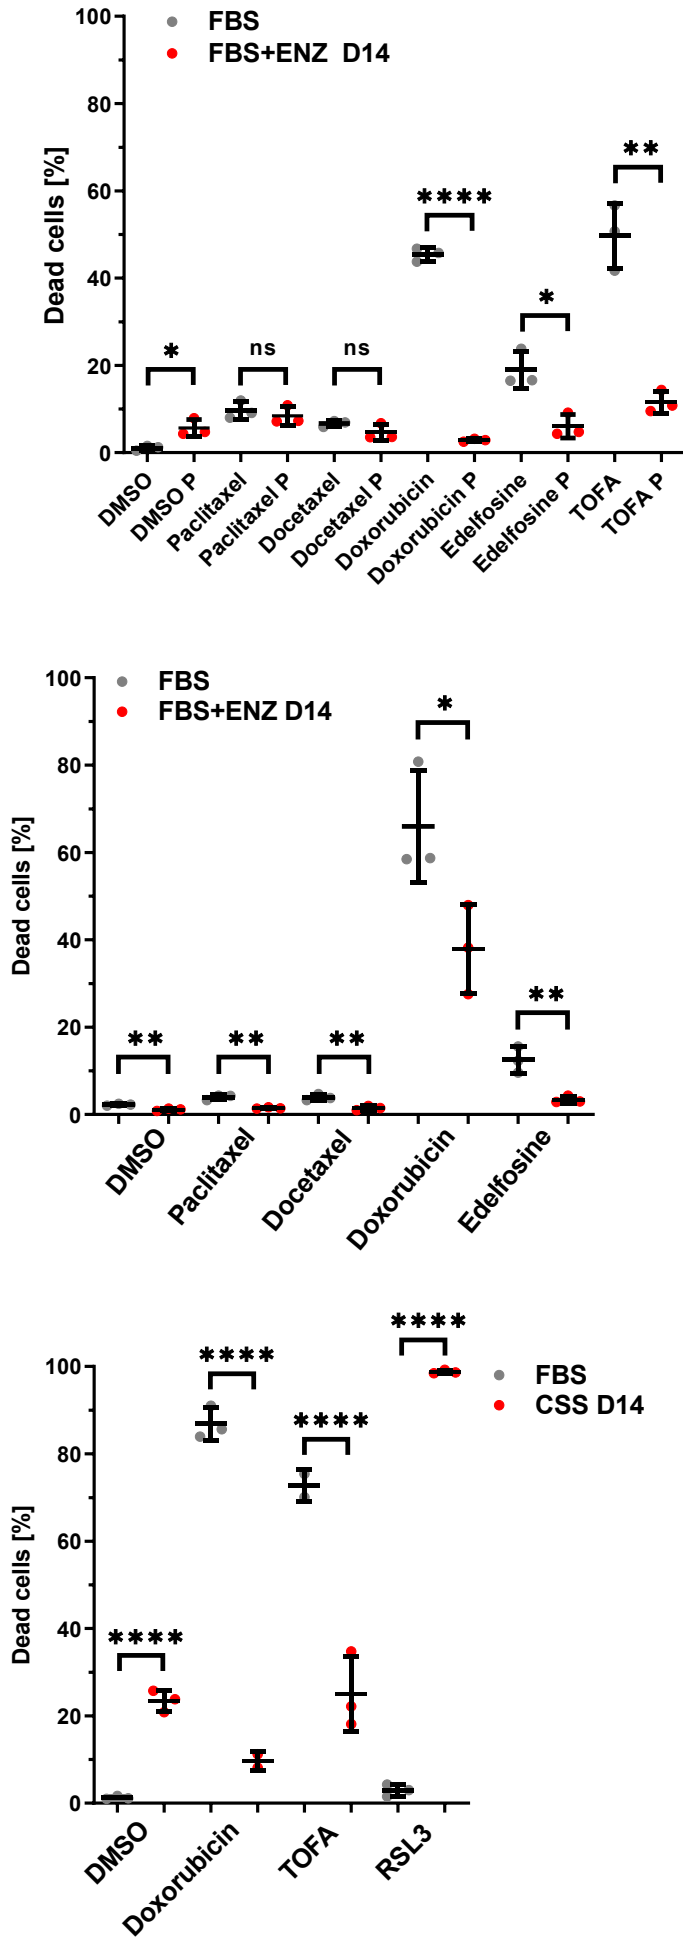

Fig S2H

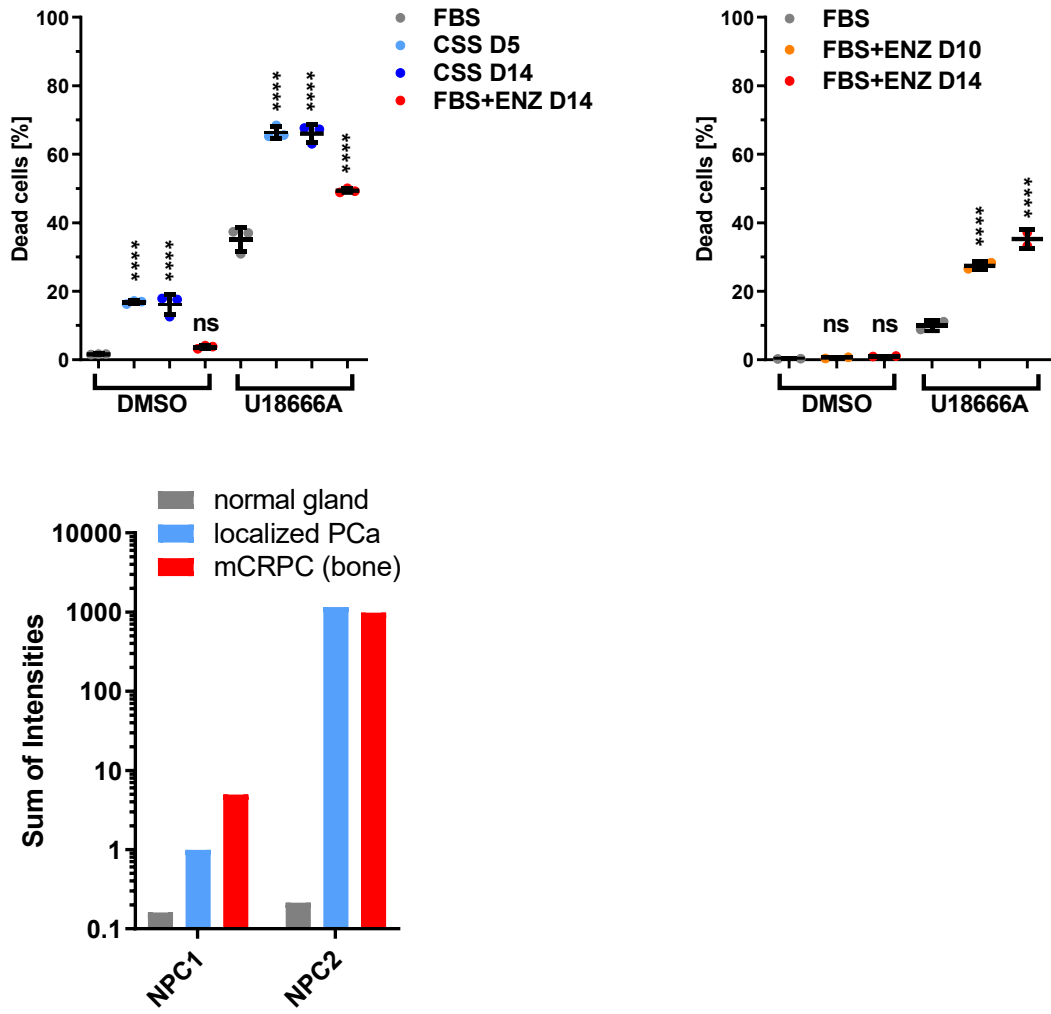

Fig S3A

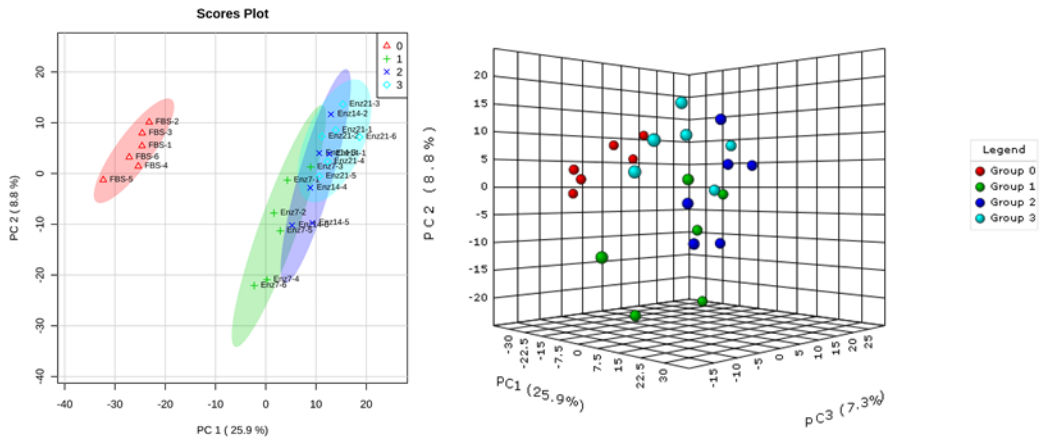

Fig S3B

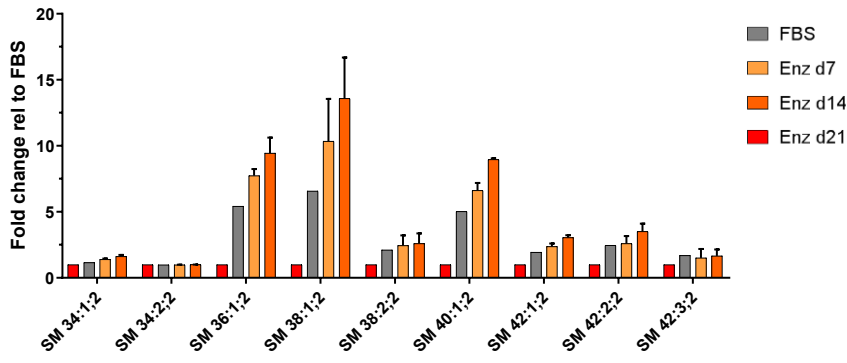

Fig S3C

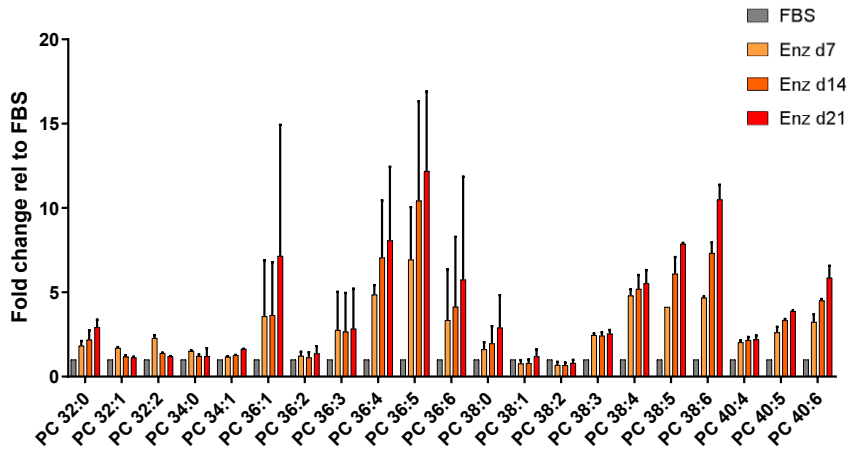

Fig S4D

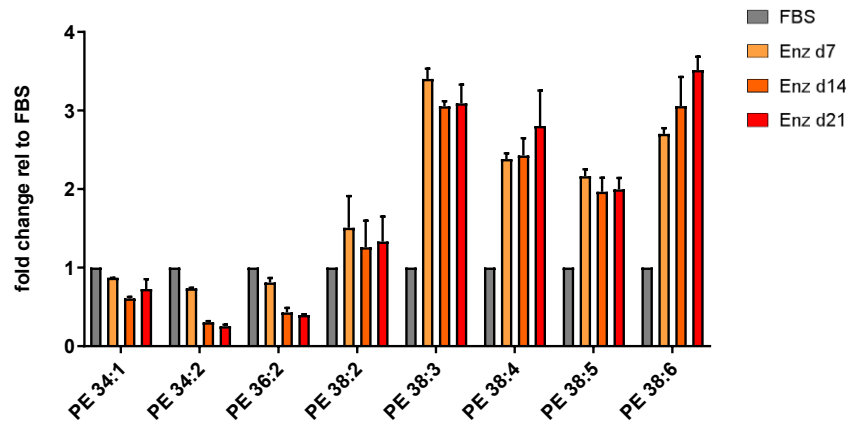



**Fig S3E**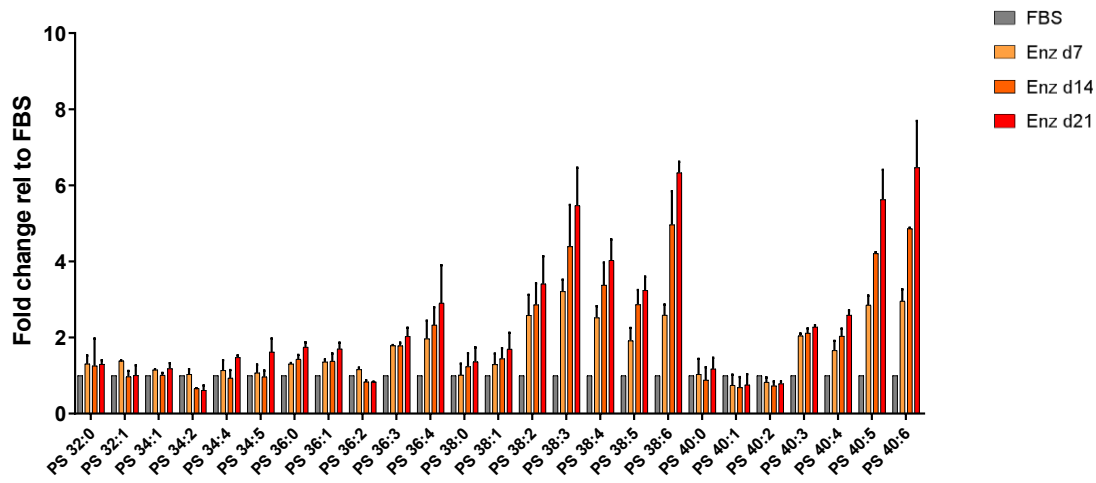**Fig S3F**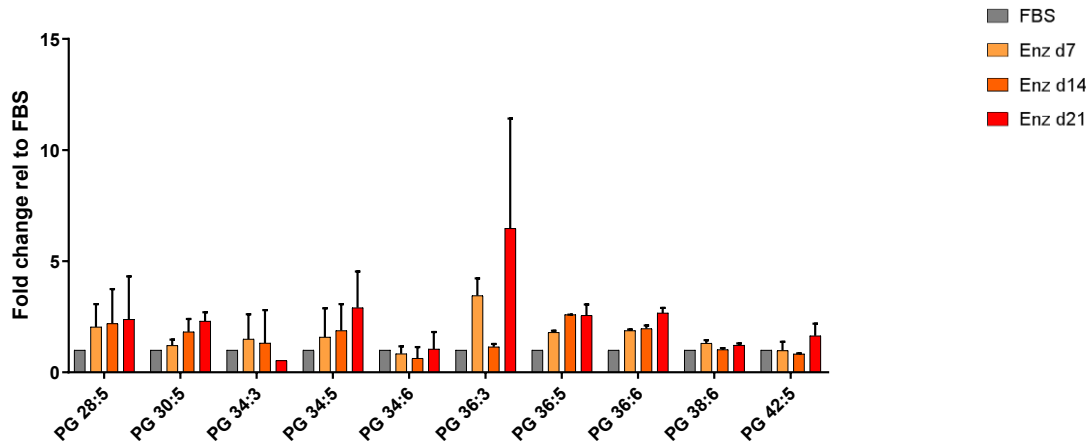**Fig S3G**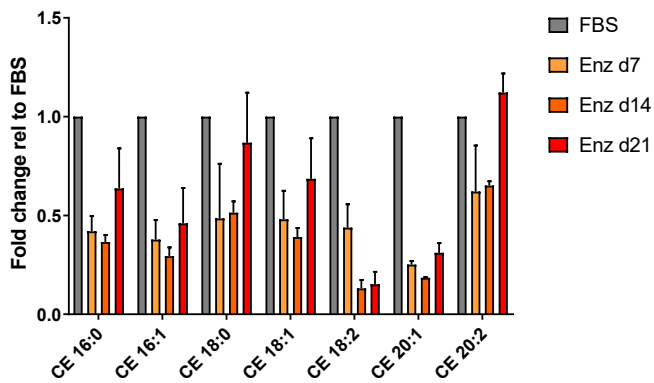**Fig S3H**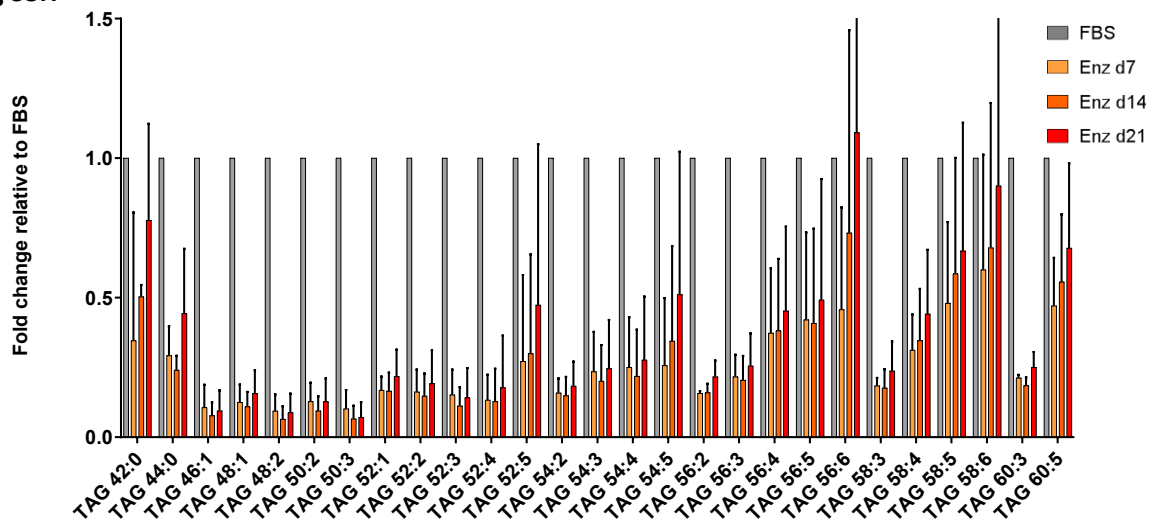

Fig S3I

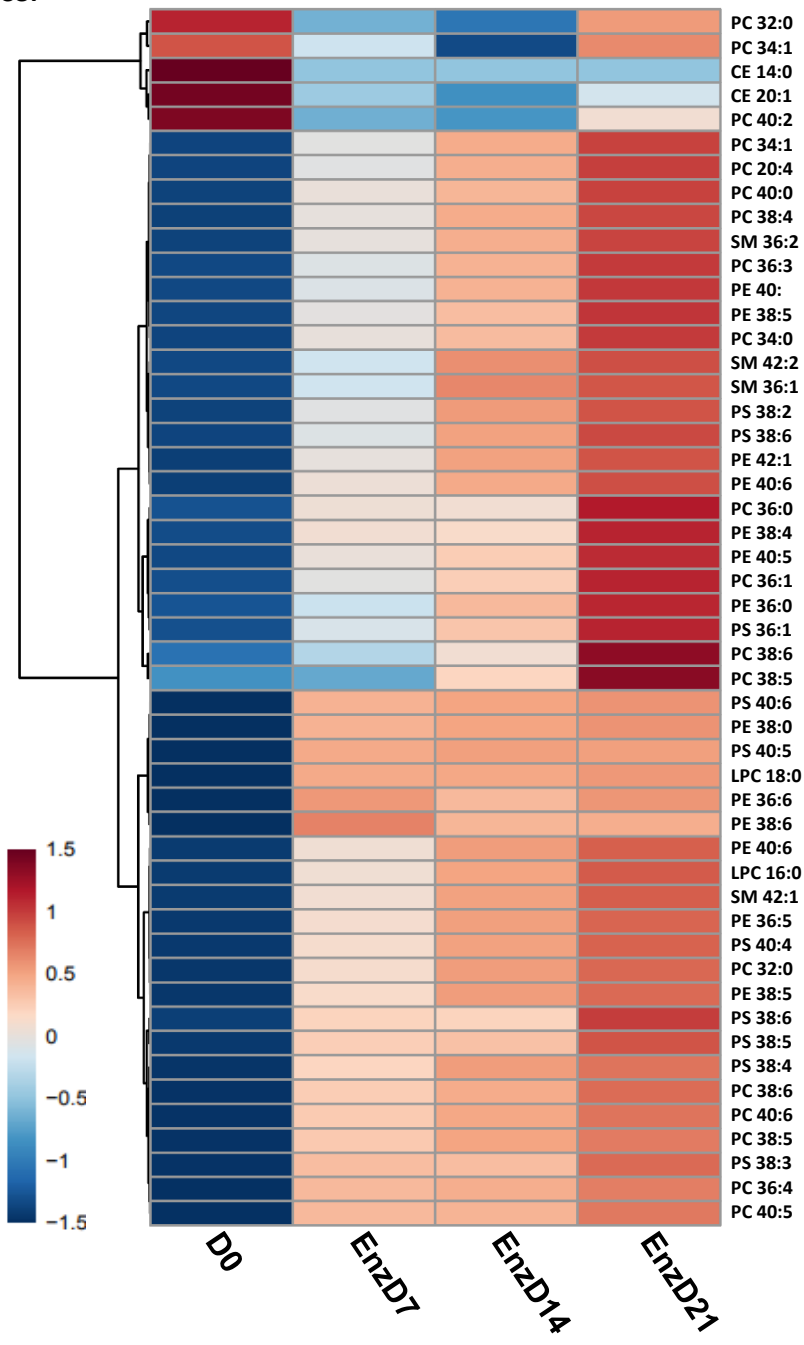

Fig S4A

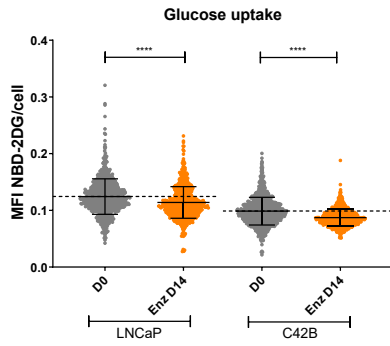

Fig S4B

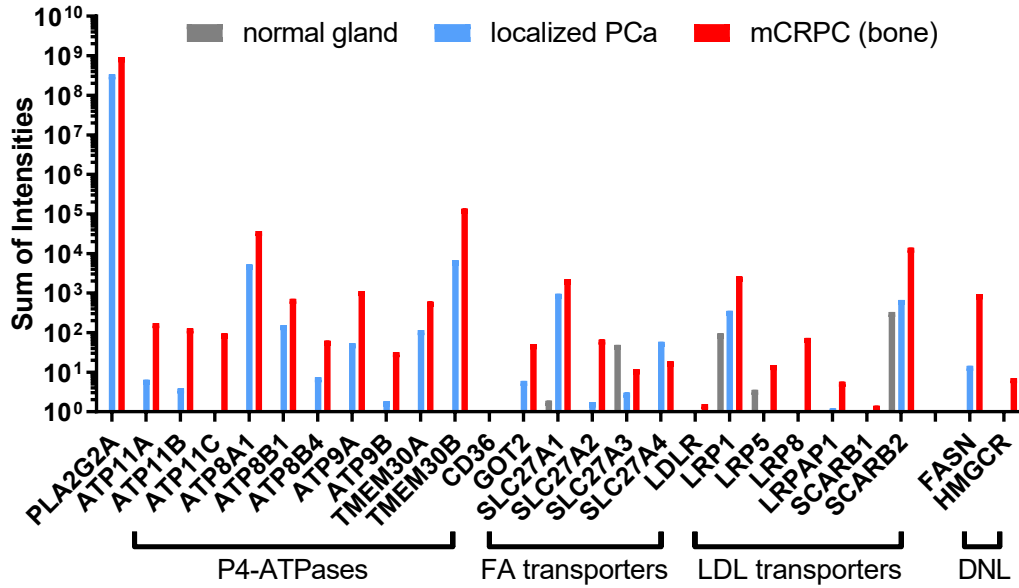

Fig S4C

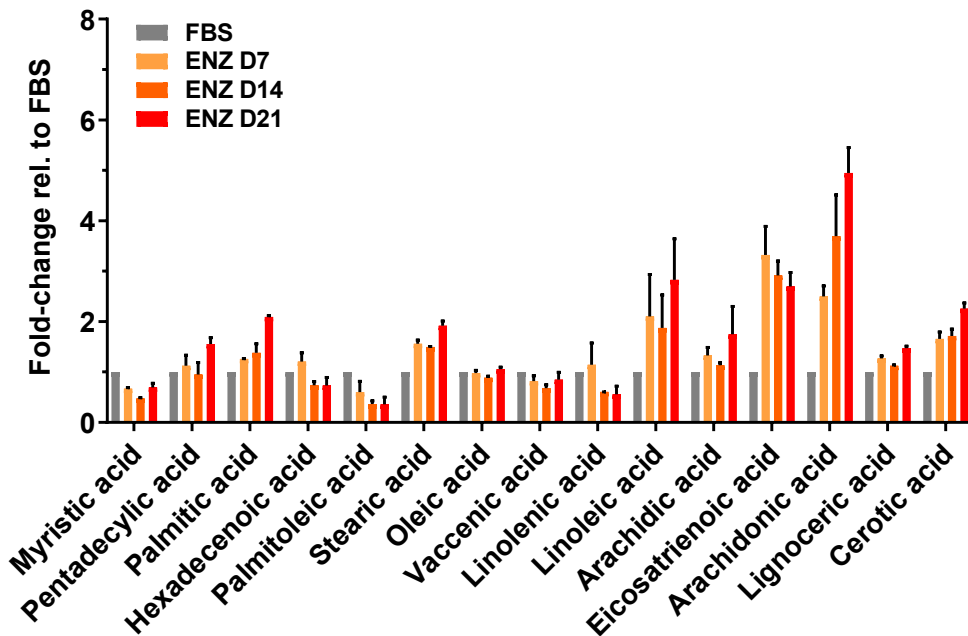

Fig S4D

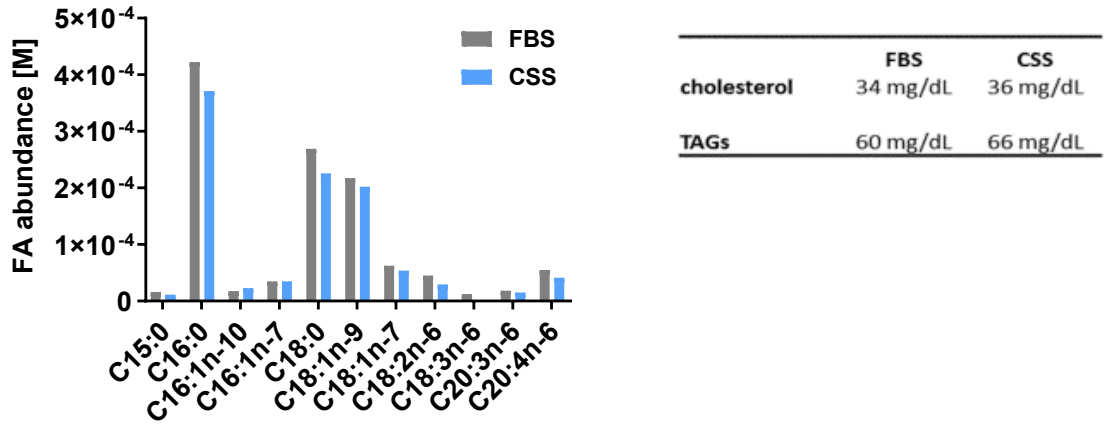

Fig S4E

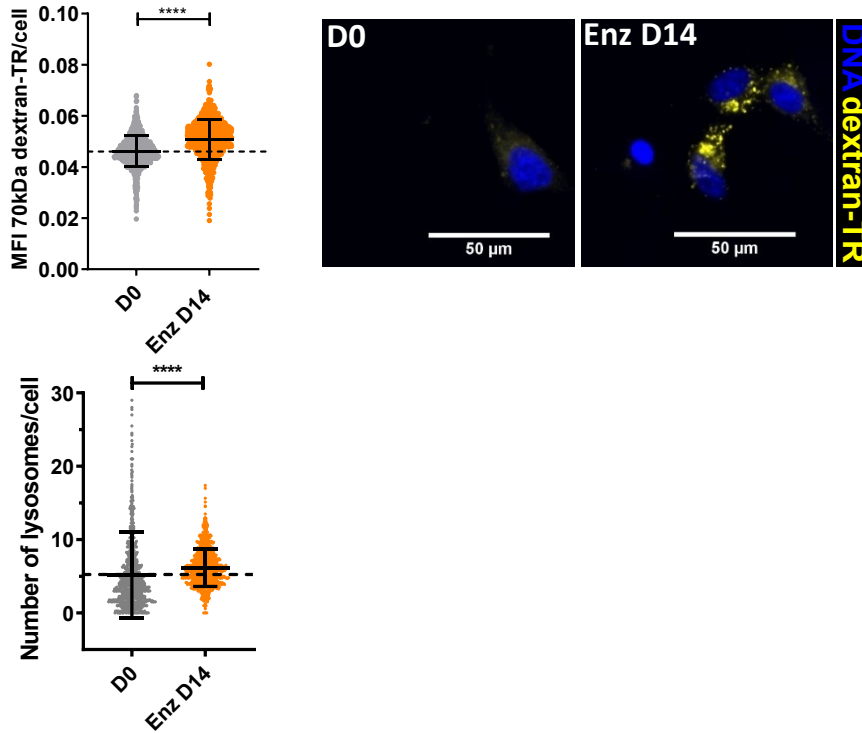

Fig S4F

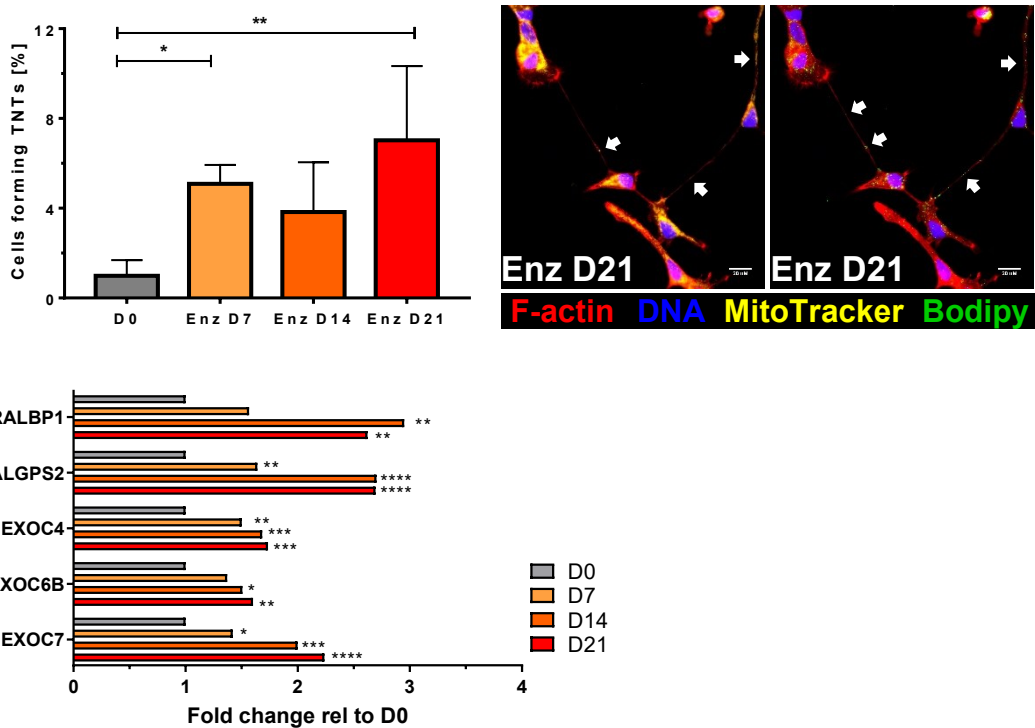

Fig S5A

| KEGG pathway name                       | Number of genes | P-value  |
|-----------------------------------------|-----------------|----------|
| Arachidonic acid metabolism             | 13              | 2.34e-10 |
| Linoleic acid metabolism                | 9               | 2.86e-10 |
| Retinol metabolism                      | 8               | 0.000011 |
| Biosynthesis of unsaturated fatty acids | 5               | 0.000025 |
| Drug Metabolism                         | 7               | 0.0015   |
| Metabolism of xenobiotics               | 7               | 0.00253  |
| Fatty acid metabolism                   | 4               | 0.0267   |
| Fatty acid elongation                   | 3               | 0.0435   |

| KEGG pathway name                              | Number of proteins | P-value        |
|------------------------------------------------|--------------------|----------------|
| <b>Biosynthesis of unsaturated fatty acids</b> | <b>5</b>           | <b>3.99e-5</b> |
| <b>Glycosphingolipid biosynthesis</b>          | <b>4</b>           | <b>8.95e-4</b> |
| <b>Fatty acid metabolism</b>                   | <b>4</b>           | <b>0.0062</b>  |
| Fatty acid elongation                          | 1                  | 0.0605         |

Fig S5B

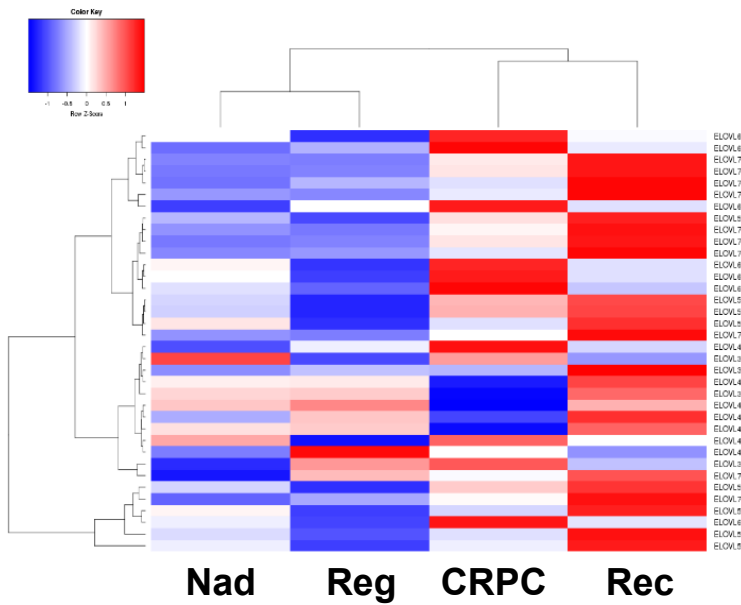

Fig S5C

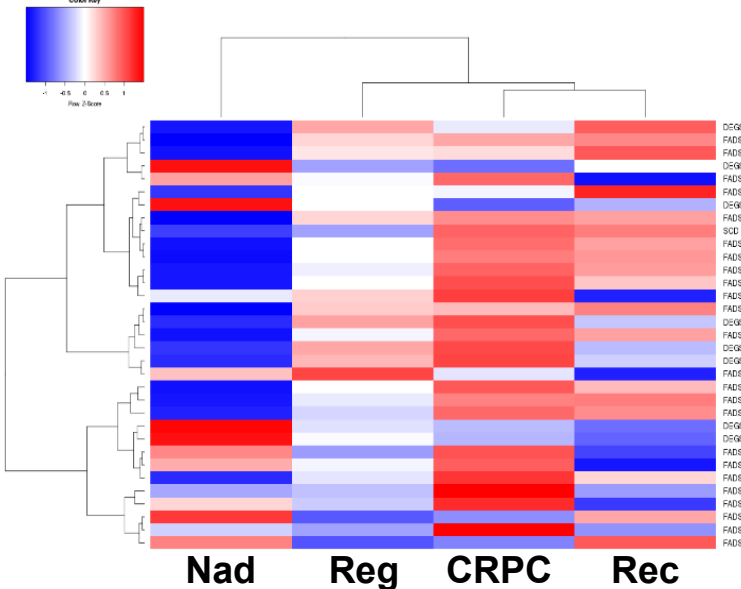

Fig S5D

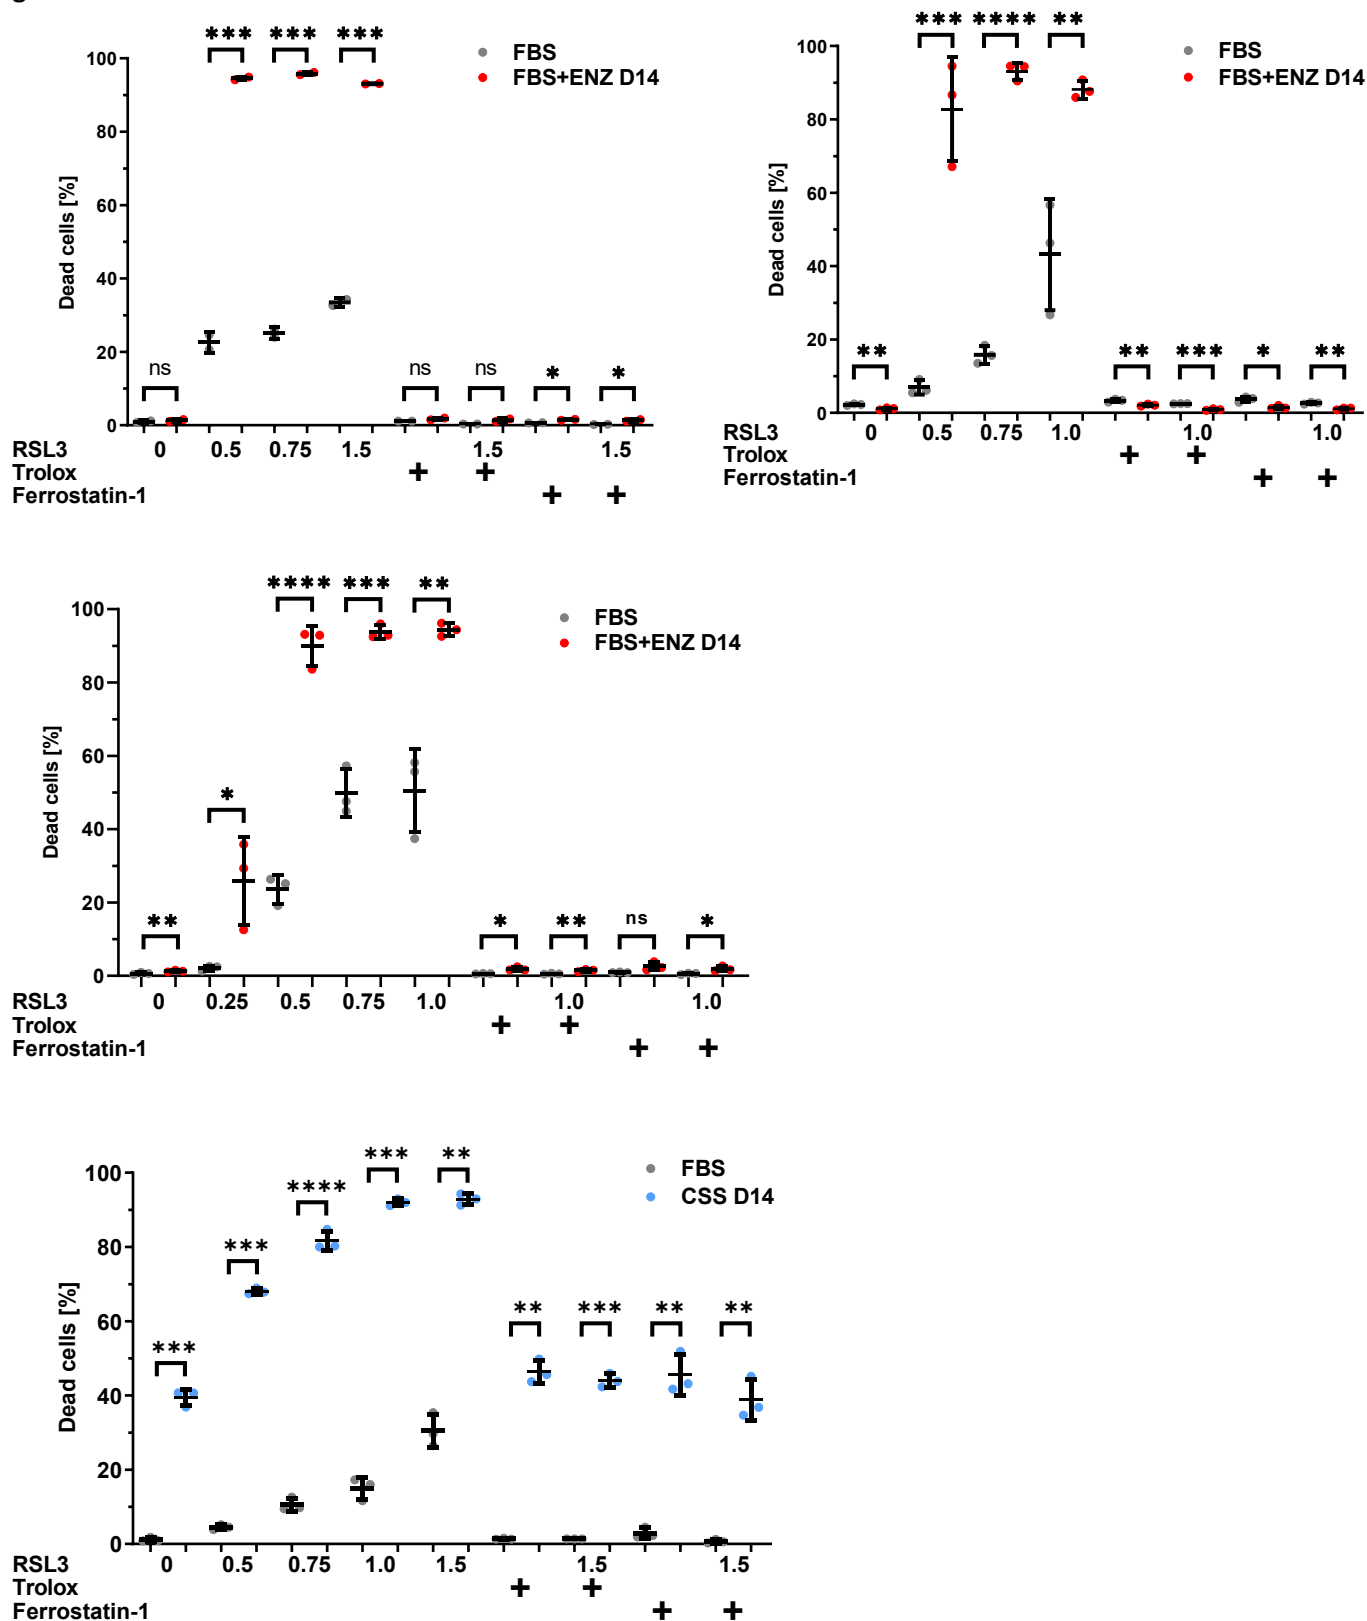

Fig S5E

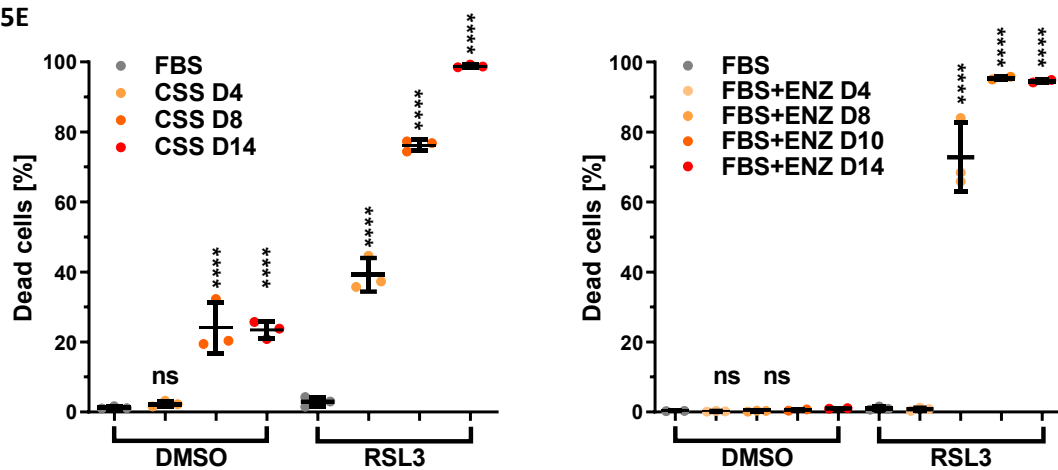

Fig S5F

| Reactome pathways                             | # reference list | # detected | # expected | +/- | Fold Enrichment | raw P value | FDR      |
|-----------------------------------------------|------------------|------------|------------|-----|-----------------|-------------|----------|
| Selenocysteine synthesis (R-HSA-2408557)      | 93               | 51         | 1.48       | +   | 34.47           | 1.48E-55    | 2.70E-53 |
| Selenoamino acid metabolism (R-HSA-2408522)   | 116              | 51         | 1.85       | +   | 27.64           | 1.01E-51    | 1.30E-49 |
| eNOS activation (R-HSA-203615)                | 11               | 3          | 0.17       | +   | 17.14           | 1.22E-03    | 2.47E-02 |
| Metabolism of nitric oxide (R-HSA-202131)     | 15               | 3          | 0.24       | +   | 12.57           | 2.61E-03    | 4.23E-02 |
| eNOS activation and regulation (R-HSA-203765) | 15               | 3          | 0.24       | +   | 12.57           | 2.61E-03    | 4.17E-02 |
| Cellular responses to stress (R-HSA-2262752)  | 393              | 19         | 6.25       | +   | 3.04            | 3.01E-05    | 9.55E-04 |

Fig S5G

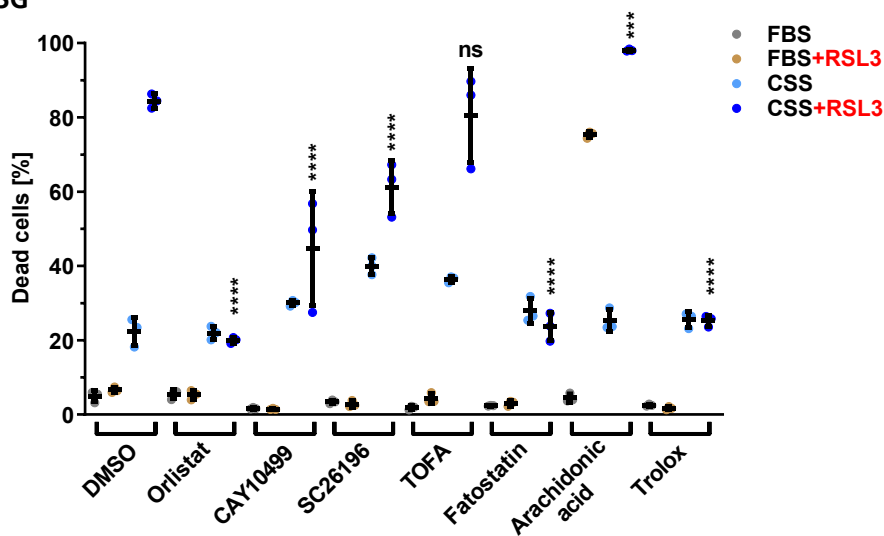

Supplement: 40170_2020_217_MOESM2_ESM.pdf [file 40170_2020_217_MOESM2_ESM.pdf]
